# Supplementary material for: Primer-BLAST: A tool to design target-specific primers for polymerase chain reaction
Source: Springer Nature journal article supplement (doi:10.1186/1471-2105-13-134), 2012-06-18

Exon 1

Exon 2

Exon 3

Exon 4

Exon 5

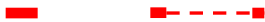

273 312

442

2267

Variant 5

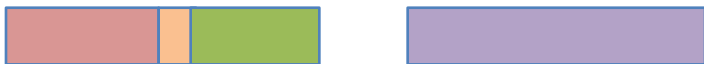

Variant 1

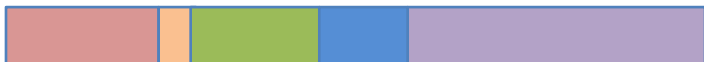

Variant 2

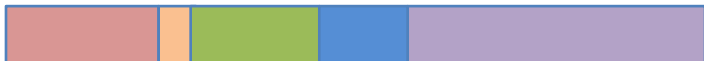

Variant 3

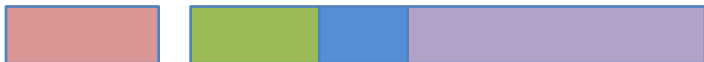

Variant 6

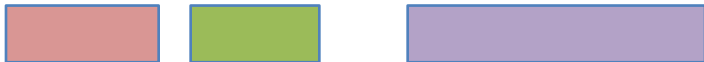

Variant 4

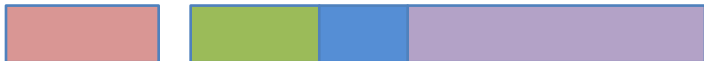

Variant 7

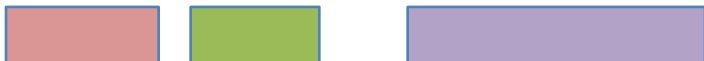

Supplement: 12859_2012_5274_MOESM4_ESM.pdf [file 12859_2012_5274_MOESM4_ESM.pdf]
