# Supplementary material for: Primer-BLAST: A tool to design target-specific primers for polymerase chain reaction
Source: Springer Nature journal article supplement (doi:10.1186/1471-2105-13-134), 2012-06-18
Supplement: 12859_2012_5274_MOESM5_ESM.pdf [file 12859_2012_5274_MOESM5_ESM.pdf]

**Input PCR template**  
**Range**  
**Specificity of primers**  
**Other reports**

[NM\\_001098494.1](#) Homo sapiens zinc finger protein 419 (ZNF419), transcript variant 5, mRNA  
1 - 2285  
Primer pairs are specific to input template as no other targets were found in selected database: Refseq mRNA (Organism limited to Homo sapiens)  
[▶ Search Summary](#)

### ▼ Summary of primer pairs

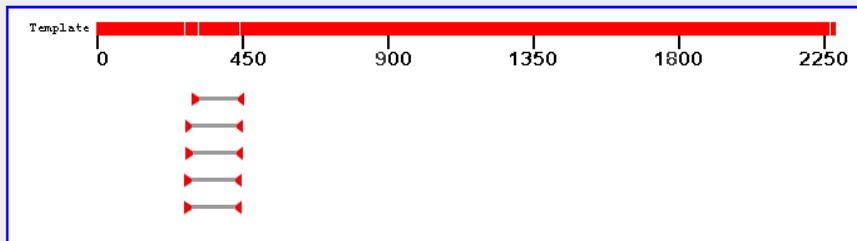

Note: a break in the template graph indicates the exon-exon junction

### ▼ Detailed primer reports

#### Primer pair 1

|                | Sequence (5'>3')                                                    | Template strand | Length | Start | Stop | Tm    | GC%   | Self complementarity | Self 3' complementarity |
|----------------|---------------------------------------------------------------------|-----------------|--------|-------|------|-------|-------|----------------------|-------------------------|
| Forward primer | ACAGACCATGAGGAGCAGGGCTA                                             | Plus            | 23     | 298   | 320  | 58.85 | 56.52 | 4.00                 | 2.00                    |
| Reverse primer | CGGCTCCATGCCAACCAACCCA                                              | Minus           | 21     | 460   | 440  | 59.91 | 61.90 | 4.00                 | 0.00                    |
| Product length | 163                                                                 |                 |        |       |      |       |       |                      |                         |
| Exon junction  | 312/313 (forward primer) on template <a href="#">NM_001098494.1</a> |                 |        |       |      |       |       |                      |                         |

#### Products on intended target

>[NM\\_001098494.1](#) Homo sapiens zinc finger protein 419 (ZNF419), transcript variant 5, mRNA

product length = 163

Forward primer 1 ACAGACCATGAGGAGCAGGGCTA 23  
Template 298 ..... 320

Reverse primer 1 CGGCTCCATGCCAACCAACCCA 21  
Template 460 ..... 440
