# Supplementary material for: Primer-BLAST: A tool to design target-specific primers for polymerase chain reaction
Source: Springer Nature journal article supplement (doi:10.1186/1471-2105-13-134), 2012-06-18
Supplement: 12859_2012_5274_MOESM6_ESM.pdf [file 12859_2012_5274_MOESM6_ESM.pdf]

## Primer pair 1

|                       | Sequence (5'->3')       | Length | Tm    | GC%   | Self complementarity | Self 3' complementarity |
|-----------------------|-------------------------|--------|-------|-------|----------------------|-------------------------|
| <b>Forward primer</b> | GTAGGACTGCTCAGTTCAAACAT | 23     | 52.81 | 43.48 | 6.00                 | 2.00                    |
| <b>Reverse primer</b> | ACAGTTACTACACCCGTAAGGC  | 22     | 53.90 | 50.00 | 5.00                 | 2.00                    |

### Products on target templates

---

>[NM\\_001098494.1](#) Homo sapiens zinc finger protein 419 (ZNF419), transcript variant 5, mRNA

product length = 444  
Forward primer 1 GTAGGACTGCTCAGTTCAAACAT 23  
Template 493 ..... 515  
  
Reverse primer 1 ACAGTTACTACACCCGTAAGGC 22  
Template 936 ..... 915

product length = 780  
Forward primer 1 GTAGGACTGCTCAGTTCAAACAT 23  
Template 493 ..... 515  
  
Reverse primer 1 ACAGTTACTACACCCGTAAGGC 22  
Template 1272 .....CG..G...TT..... 1251

>[NM\\_001098491.1](#) Homo sapiens zinc finger protein 419 (ZNF419), transcript variant 1, mRNA

product length = 444  
Forward primer 1 GTAGGACTGCTCAGTTCAAACAT 23  
Template 592 ..... 614  
  
Reverse primer 1 ACAGTTACTACACCCGTAAGGC 22  
Template 1035 ..... 1014

product length = 780  
Forward primer 1 GTAGGACTGCTCAGTTCAAACAT 23  
Template 592 ..... 614  
  
Reverse primer 1 ACAGTTACTACACCCGTAAGGC 22  
Template 1371 .....CG..G...TT..... 1350

>[NM\\_198542.1](#) Homo sapiens zinc finger protein 773 (ZNF773), mRNA

product length = 444  
Forward primer 1 GTAGGACTGCTCAGTTCAAACAT 23  
Template 453 ...A.G...CA.....G. 475  
  
Reverse primer 1 ACAGTTACTACACCCGTAAGGC 22  
Template 896 .....C.....A..... 875
