# Supplementary material for: Primer-BLAST: A tool to design target-specific primers for polymerase chain reaction
Source: Springer Nature journal article supplement (doi:10.1186/1471-2105-13-134), 2012-06-18
Supplement: 12859_2012_5274_MOESM7_ESM.pdf [file 12859_2012_5274_MOESM7_ESM.pdf]

Example 1

Primer pair found by QuantPrime to be specific to human EFNA4 transcript variant 3 (NM\_182690.2):

>NM\_005227.2 Homo sapiens ephrin-A4 (EFNA4), transcript variant 1, mRNA

```

product length = 274
Forward primer 1   TCTGTCTGCTGCAAGGAGAGGAAC 24
Template       535 .....G 558

Reverse primer 1   TCCATCTTGTTCGGTCTGAATTGGC 24
Template       808 ..... 785

```

Example 2

Primer pair found by QuantPrime to be specific to Homo sapiens ribosomal protein S4, Y-linked 2 (RPS4Y2), mRNA (NM\_001039567.2):

>NM\_001008.3 Homo sapiens ribosomal protein S4, Y-linked 1 (RPS4Y1), mRNA

```

product length = 75
Forward primer 1   AAGCACTTGAAGCGTGTGCAG 22
Template       62 .....A..... 83

Reverse primer 1   TGGACGAGGTGCAAATACACCAG 23
Template       136 .....C. 114

```

Example 3

Primer pair found by QuantPrime to be specific to Homo sapiens keratin 85 (KRT85), mRNA (NM\_002283.3)

>NM\_002281.3 Homo sapiens keratin 81 (KRT81), mRNA

```

product length = 136
Forward primer 1   TCAAGATGGACAACAGCCGAGAC 23
Template       832 .....C.....G... 854

Reverse primer 1   GCCTTCATCTCCTCACACTTGC 22
Template       967 ..... 946

```

Example 4

Primer pair found by PRIMEGENS to be specific to Arabidopsis thaliana phospholipase D (PLDBETA1) mRNA (NM\_129765.3)

>NM\_116245.1 Arabidopsis thaliana phospholipase D beta 2 (PLDBETA2) mRNA, complete cds

```

product length = 167
Forward primer 1   CGACATAGTTGGGTCAAGCA 20
Template       1282 .....A.. 1301

Reverse primer 1   AACACGGATGCTGAGGAGT 20
Template       1448 .....T..... 1429

```

Example 5

Primer pair found by PRIMEGENS to be specific to Arabidopsis thaliana uncharacterized protein (AT2G41960) mRNA (NM\_129760.4)

>NM\_126174.4 Arabidopsis thaliana origin recognition complex subunit 4 (ORC4) mRNA, complete cds

```

product length = 668
Forward primer 1   TTCTGGGTTTGGTCTGAGG 20
Template       1111 ..G..C..AG.A..... 1092

Reverse primer 1   AGGCATCTGGAACAGCACAT 20
Template       444 G.....G....CT..... 463

```
